# Supplementary material for: An X-ray absorption spectroscopic study of the effect of bond covalency on the electronic structure of Gd2Ti2−xSnxO7
Source: Royal Society of Chemistry journal article supplement (doi:10.1039/c3cp51250a), 2013-01-01
Supplement: c3cp51250a.pdf [file c3cp51250a.pdf]

## SUPPLEMENTARY INFORMATION

### An X-ray absorption spectroscopic study of the effect of bond covalency on the electronic structure of $\text{Gd}_2\text{Ti}_{2-x}\text{Sn}_x\text{O}_7$

Esther Rani Aluri and Andrew P. Grosvenor\*

*Department of Chemistry, University of Saskatchewan, Saskatoon, SK, S7N 5C9*

| $\text{Y}_2\text{Ti}_{2-x}\text{Sn}_x\text{O}_7$ |            |
|--------------------------------------------------|------------|
| x                                                | a (Å)      |
| 0.0                                              | 10.0969(2) |
| 1.0                                              | 10.2389(5) |
| 2.0                                              | 10.3731(1) |

**Table S1:** Lattice constants from the  $\text{Y}_2\text{Ti}_{2-x}\text{Sn}_x\text{O}_7$  series.

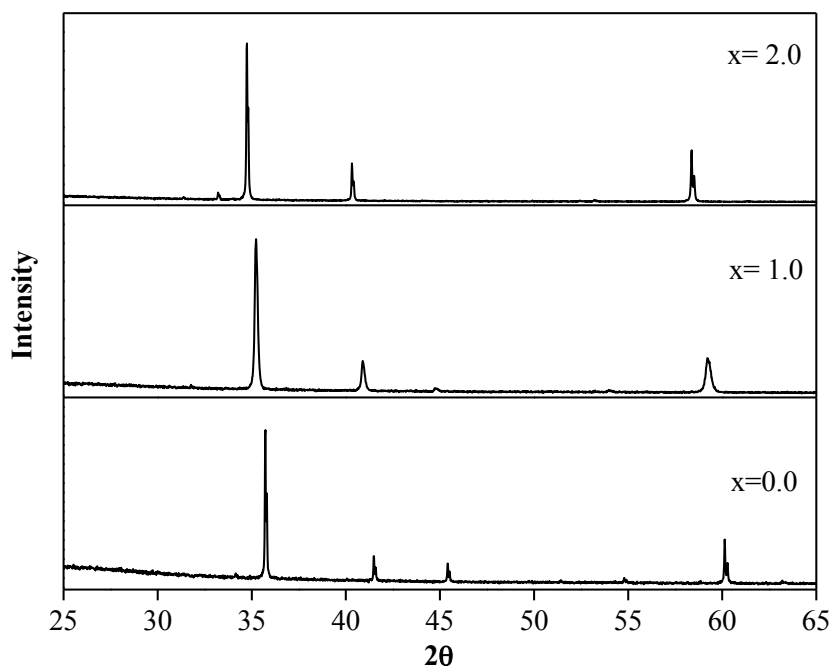

**Figure S1:** XRD patterns from the  $Y_2Ti_{2-x}Sn_xO_7$  series are shown. The diffraction peaks shift to lower  $2\theta$  with increasing Sn content.
